# Supplementary material for: Effect of Etomidate vs Propofol for Total Intravenous Anesthesia on Major Postoperative Complications in Older Patients: A Randomized Clinical Trial
Source: PubMed Central journal article supplement (PMC9366659; doi:10.1001/jamasurg.2022.3338), 2022-08-10
Supplement: jamasurg-e223338-s003.pdf [file jamasurg-e223338-s003.pdf]

## Data Sharing Statement

Lu. Effect of Etomidate vs Propofol for Total Intravenous Anesthesia on Major Postoperative Complications in Older Patients. *JAMA Surg.* Published August 10, 2022.

doi:10.1001/jamasurg.2022.3338

### Data

**Data available:** Yes

**Data types:** Deidentified participant data

**How to access data:** How to access data: [mzkxiz@126.com](mailto:mzkxiz@126.com); [hldong6@hotmail.com](mailto:hldong6@hotmail.com)

**When available:** With publication

### Supporting Documents

**Document types:** None

### Additional Information

**Who can access the data:** Who can access the data: Anyone requesting

**Types of analyses:** Types of analyses: For verification

**Mechanisms of data availability:** Mechanisms of data availability: With signed data access agreement and approval of a proposal

**Any additional restrictions:** None
